# Supplementary material for: Boron modified TiO2 nanotubes supported Rh-nanoparticle catalysts for highly efficient hydroformylation of styrene
Source: Royal Society of Chemistry journal article supplement (doi:10.1039/c7nj01050h), 2017-01-01
Supplement: c7nj01050h1.pdf [file c7nj01050h1.pdf]

**Submitted to NJC**

---

**Electronic Supporting Information**

**Boron Modified TiO<sub>2</sub> Nanotubes Supported Rh-nanoparticle Catalysts for  
Highly Efficient Hydroformylation of Styrene**

Yukun Shi <sup>a\*</sup>, Xiaojing Hu <sup>b</sup>, Ling Chen <sup>a</sup>, Yang Lu <sup>a</sup>, Baolin Zhu <sup>b</sup>, Shoumin Zhang <sup>b</sup>,

Weiping Huang <sup>b\*</sup>

<sup>a</sup> Institute of Chemistry for Functionalized Materials, College of Chemistry and Chemical Engineering, Liaoning Normal University, Dalian 116029, China

<sup>b</sup> Collaborative Innovation Center of Chemical Science and Engineering (Tianjin), The Key Laboratory of Advanced Energy Materials Chemistry (Ministry of Education), Tianjin Key Lab of Metal and Molecule-based Material Chemistry and College of Chemistry, Nankai University, Tianjin 300071, China.

S.1 TEM of Rh/B-TNTs

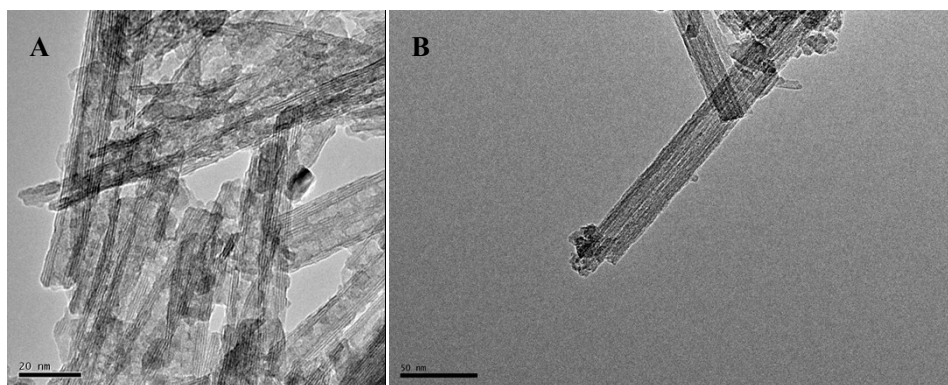

Fig. S1 TEM images of Rh/B-TNTs-Hydrothermal-5% (A) and Rh/B-TNTs-Impregnation-5% (B).
